# Supplementary material for: Molecular Profiling of Athletes Performing High-Intensity Exercises in Extreme Environments
Source: MDPI journal article supplement (doi:10.3390/sports11020036), 2023-02-02

**Figure S1.** Results of determination of hyperreactive reaction to food allergens mediated by immune processes

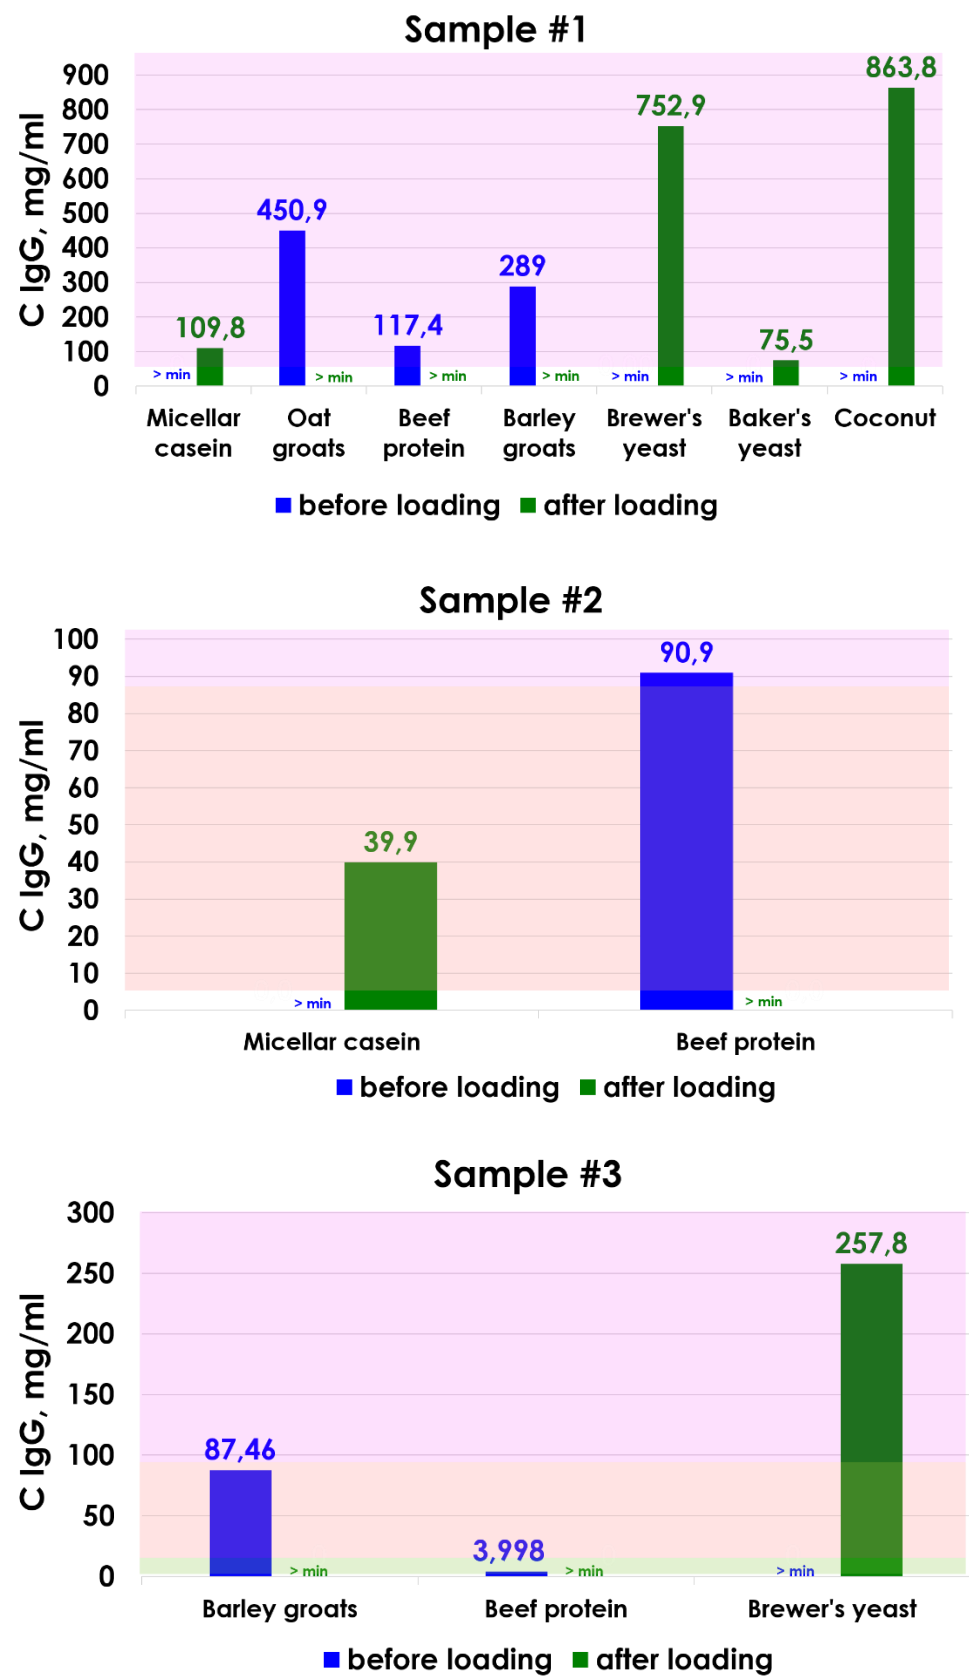

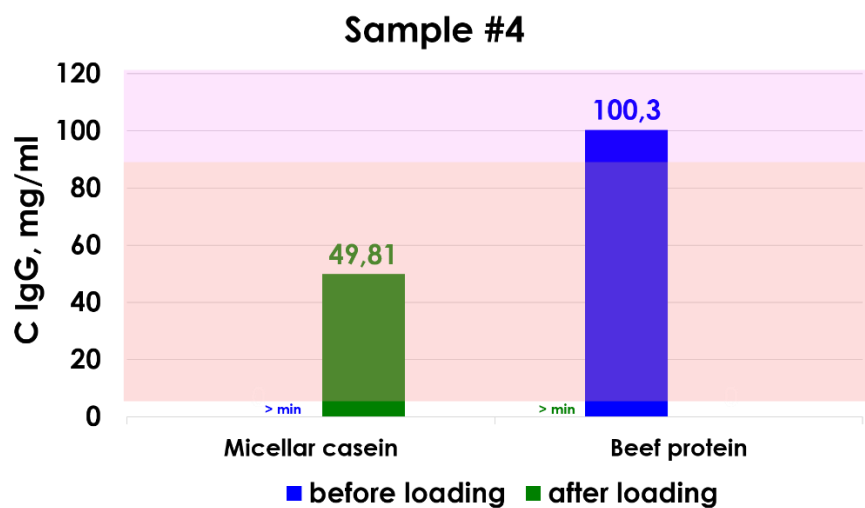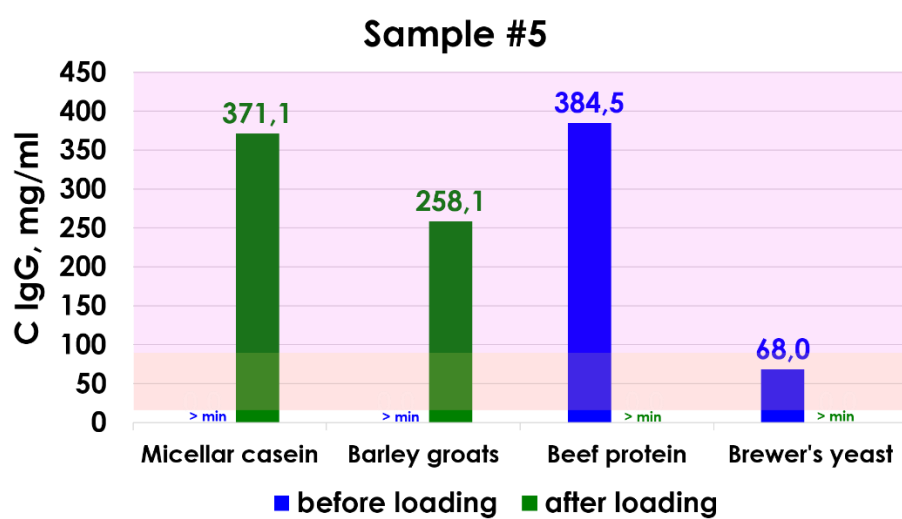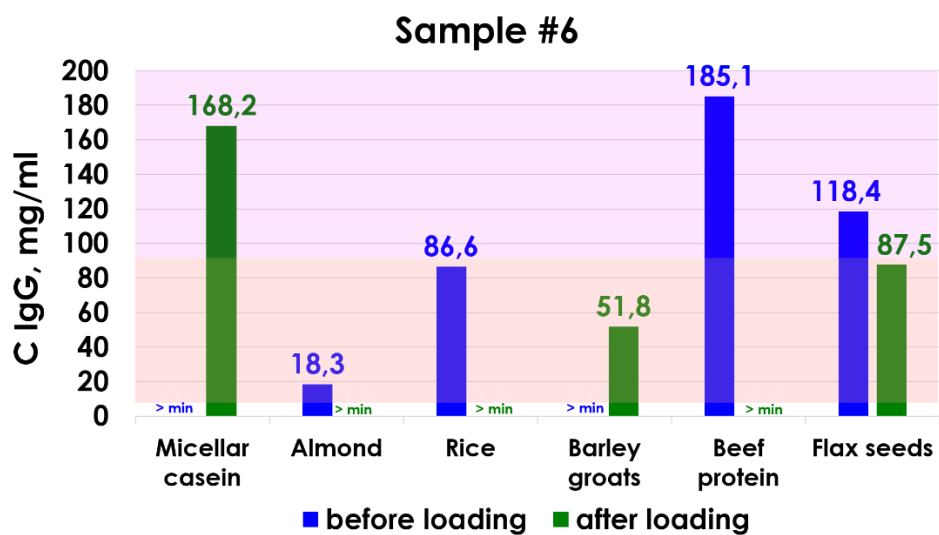

Sample #7

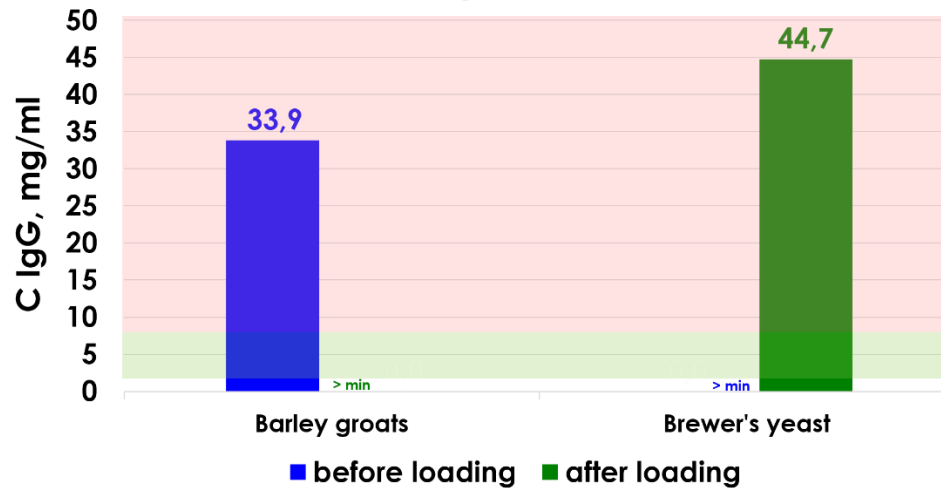

Sample #8

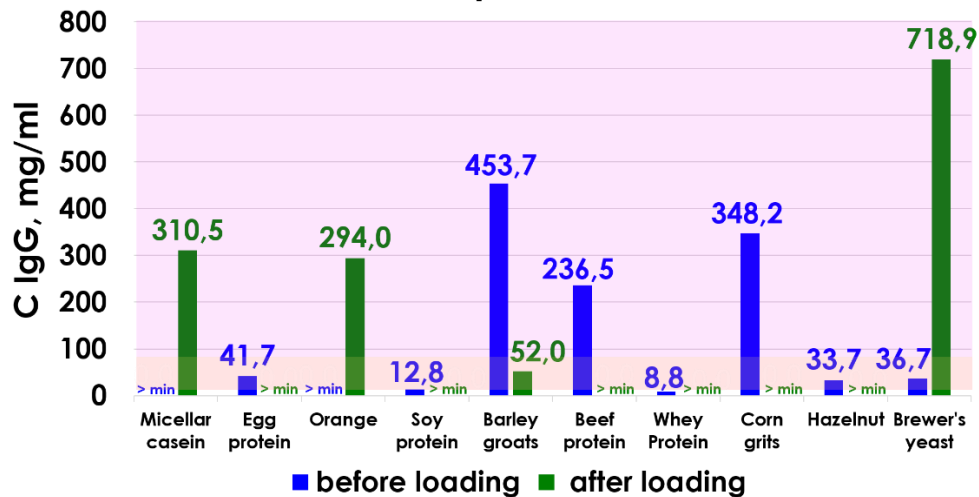

Sample #9

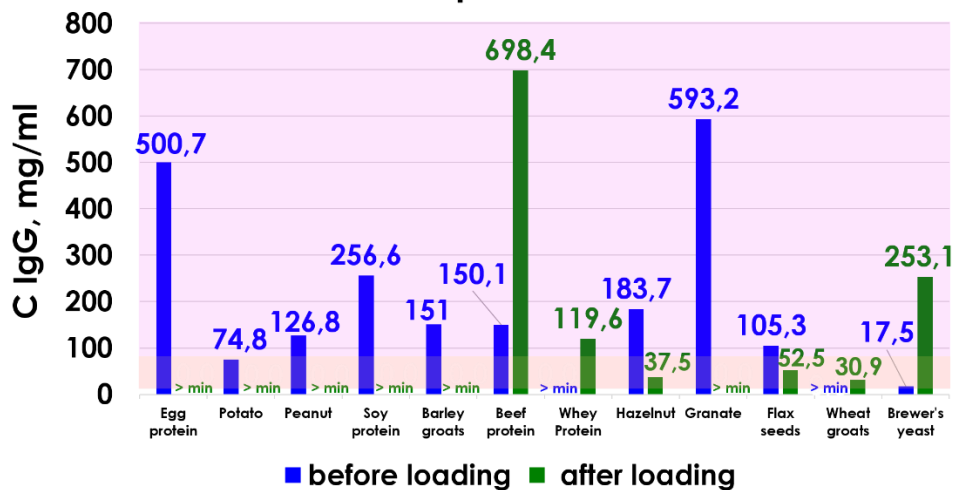

### Sample #10

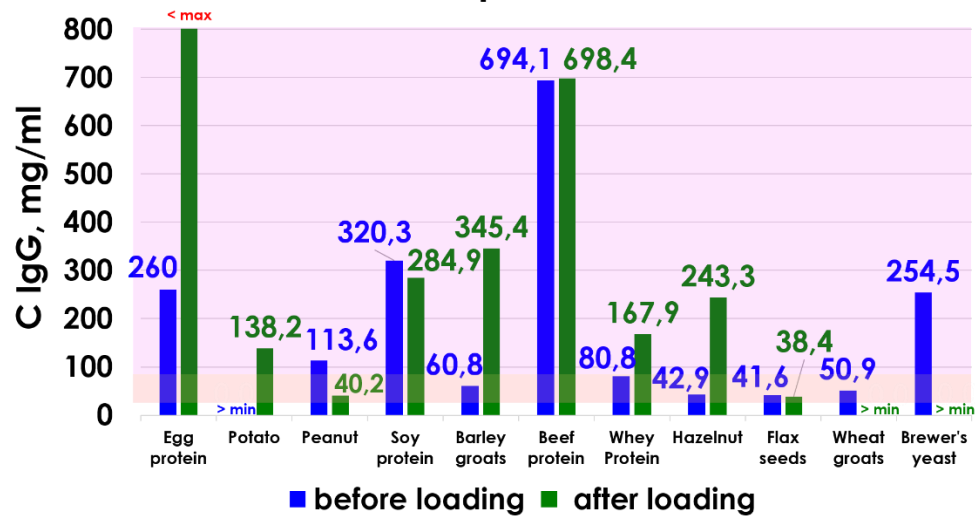

### Sample #11

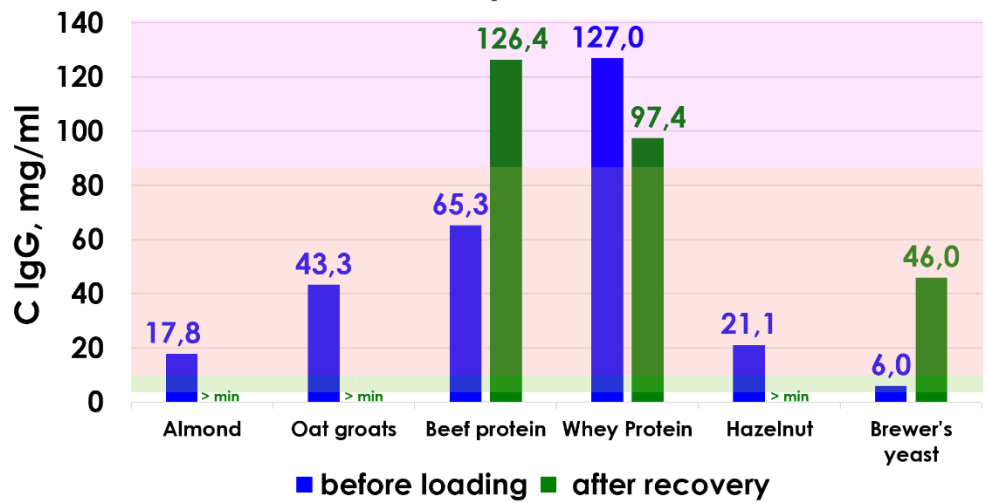

Supplement: s1 [file s1]
