# Supplementary material for: Molecular Profiling of Athletes Performing High-Intensity Exercises in Extreme Environments
Source: Sports (Basel). 2023 Feb 2;11(2):36. doi: 10.3390/sports11020036 (PMC9963857; doi:10.3390/sports11020036)
Supplement: Supplementary file 1 [file sports-11-00036-s001.zip › Supplementary S2.xlsx]

## Sheet: Table S1
Amino acids detected in the blood plasma of athletes before loading and after loading
metabolite	Mean Concentration, (µM/l) BL*	Mean Concentration (µM/l) AR**	SD BL*	SD AL**	Fold Change
2-ketoglutaric Acid	1.26	2.68	1.60	4.14	2.11
3-Methylhistidine	0.77	0.13	1.01	0.17	0.17
Alanine	14.46	9.08	0.40	0.83	0.62
Arginine	4.37	4.70	0.70	4.03	1.07
Ascorbic Acid	1.86	3.19	1.88	3.87	1.71
Aspartic acid	2.01	3.16	1.71	2.97	1.56
Carnosine	1.26	0.40	0.96	0.18	0.31
cis-Aconitic Acid	1.29	3.37	1.38	4.38	2.59
Citric Acid	1.25	4.58	0.09	0.66	3.66
Citrulline	2.87	1.48	0.76	0.50	0.51
Creatinine	15.14	8.20			0.54
Epinephrine	17.61	42.95			2.43
Fumaric Acid	6.37	5.03	1.90	1.71	0.78
Glutamic acid	48.04	50.27	20.33	18.49	1.04
Glycine	44.51	44.57	13.03	19.42	1.00
Histidine	34.63	16.82			0.48
Hydroxyproline	2.36	1.10			0.46
Lactic Acid	30.04	10.57	3.27	4.14	0.35
Lysine	14.97	5.32			0.35
Methionine Sulfoxide	86.03	65.19	64.51	30.46	0.75
Ornitine	5.07	1.91			0.37
Oxalic Acid	5.33	3.13	3.22	1.38	0.58
Phenilalanine	12.95	15.42	2.93	9.54	1.19
Proline	61.74	33.69			0.54
Serine	25.67	46.73	9.84	14.37	1.82
Succinic Acid	0.39	0.18	0.30	0.25	0.47
Taurine	14.51	28.83			1.98
Threonine	9.64	18.68			1.93
Tryptophane oxidized	289.81	193.25			0.66
Tyrosine	17.03	6.90			0.40
* BL – before loading; **AR – after loading
																.

## Sheet: Table S2
Hormones detected in the blood plasma of athletes before loading and after loading
Hormones	AV Area of Chromatographic Peak BL*	AV Area of Chromatographic Peak Width AR**	SD BL*	SD Al**	Fold Change
11-Deoxycortisol (Cortodoxone)	4345.38	5323.35	5593.67	1682.21	1.22
Allopregnenolone	94.6	89.07	77.25	104.18	0.94
Cort_to_DHEA	0.62	0.63	0.67	0.53	1.02
Cortisol	1494.17	707.48	1656.71	772.69	0.47
Dehydroepiandrosterone (DHEA-H2O)	4265.26	1845.0	3445.17	2306.86	0.43
Estriol (E3)	314.01	450.41	578.02	314.96	1.43
* BL – before loading; **AR – after loading.
